# Supplementary material
Source: Research Square preprint supplement (doi:10.21203/rs.3.rs-9278223/v1)
Supplement: Supplementary file 1 [file 2e652a27ef7026a01a301979.pdf]

# Supplementary Material

Trajectory-level dynamic validation of a phase-structured grey-box model for consolidated bioprocessing using literature-derived ethanol trajectories

Mark Korang Yeboah, Nana Yaw Asiedu, and Ahmad Addo

This supplement summarizes the source-data inventory underlying the literature-derived ethanol trajectory compilation used for series-level curation and dynamic modeling. The counts reported here describe the broader source compilation prior to the analytical filtering steps reported in the main manuscript.

Table S1: Source-data inventory for the literature-derived ethanol trajectory compilation.

| Metric                                   | Value |
|------------------------------------------|-------|
| Observation rows in source compilation   | 311   |
| Distinct nonblank trajectory identifiers | 56    |
| Unique literature sources                | 17    |
| Unique biomass or feedstock labels       | 23    |
| Median timepoints per identified series  | 2     |
| Residence-time range (h)                 | 0–675 |

Table S2: Source-data coverage of literature-derived ethanol observations ( $n = 311$ ), aggregated by biomass or feedstock and literature source.

| Biomass or feedstock                        | Observations | Distinct series | Literature source                                                                                                                                                                                   |
|---------------------------------------------|--------------|-----------------|-----------------------------------------------------------------------------------------------------------------------------------------------------------------------------------------------------|
| Alkali extracted deshelled corn cobs (AECC) | 7            | 3               | Artificial symbiosis for acetone-butanol-ethanol (ABE) fermentation from alkali extracted deshelled corn cobs by co-culture of <i>Clostridium beijerinckii</i> and <i>Clostridium cellulovorans</i> |
| Avicel                                      | 6            | 1               | High Ethanol Titters from Cellulose by Using Metabolically Engineered Thermophilic, Anaerobic Microbes                                                                                              |
| Avicel (2% w/v)                             | 4            | 2               | Chung et al. (2015) engineered <i>C. bescii</i> at 75°C (Biotechnol Biofuels 8:163; 10.1186/s13068-015-0346-4)                                                                                      |
| Avicel (crystalline cellulose)              | 16           | 2               | Single-step ethanol production from lignocellulose using novel extremely thermophilic bacteria                                                                                                      |
| Avicel (microcrystalline cellulose)         | 7            | 1               | Consolidated bioprocessing of lignocellulose by a microbial consortium                                                                                                                              |
| Avicel (microcrystalline cellulose)         | 10           | 5               | Minnaar & den Haan (2023) engineered <i>S. cerevisiae</i> isolates for CBP (Appl Microbiol Biotechnol 107:7013–7028; 10.1007/s00253-023-12729-4)                                                    |
| Avicel (microcrystalline cellulose)         | 14           | 2               | Xiong et al. 2018 Biotechnol Bioeng (DOI:10.1002/bit.26590)                                                                                                                                         |
| Bread & pasta fraction (BP; 7.5% dw/v)      | 4            | 2               | Gupte et al. (2024) OFMSW→bioethanol CBP with amylolytic yeast ER T12.7 (Energy Convers Manage 302:118105; 10.1016/j.enconman.2024.118105)                                                          |
| Carboxymethylcellulose (CMC)                | 9            | 1               | Producing bioethanol from cellulosic hydrolyzate via co-immobilized cultivation strategy                                                                                                            |

Continued on next page

| Biomass or feedstock                                                       | Observations | Distinct series | Literature source                                                                                                                                                                  |
|----------------------------------------------------------------------------|--------------|-----------------|------------------------------------------------------------------------------------------------------------------------------------------------------------------------------------|
| Cellobiose (5 g/L) + AFEX-CS water extract (WE)                            | 10           | 5               | Jin et al. (2012) CBP of AFEX-pretreated corn stover at high solids (Biotechnol Bioeng 109:1929–1936; DOI:10.1002/bit.24458)                                                       |
| Cellulose (0.5% w/v in CT-FUD)                                             | 24           | 2               | Wang et al. 2019 Frontiers in Microbiology 10:2035 (doi:10.3389/fmicb.2019.02035)                                                                                                  |
| Cellulose (feed)                                                           | 2            | 1               | EPFL_TH9200 thesis (Continuous CBP)                                                                                                                                                |
| Cellulosic hydrolyzate (as in Liu 2012 Fig.7)                              | 22           | 1               | Producing bioethanol from cellulosic hydrolyzate via co-immobilized cultivation strategy                                                                                           |
| Dilute acid pretreated wheat straw (washed solids + xylose)                | 13           | 1               | Consolidated bioprocessing of lignocellulose by a microbial consortium                                                                                                             |
| Dilute acid pretreated wheat straw slurry (whole slurry)                   | 13           | 1               | Consolidated bioprocessing of lignocellulose by a microbial consortium                                                                                                             |
| Discolored rice (DR; 10% dw/v)                                             | 4            | 2               | Gupte et al. (2024) OFMSW→bioethanol CBP with amyolytic yeast ER T12.7 (Energy Convers Manage 302:118105; 10.1016/j.enconman.2024.118105)                                          |
| Enriched OFMSW (OFMSW + 15% w/w BP; 7.5% dw/v)                             | 4            | 2               | Gupte et al. (2024) OFMSW→bioethanol CBP with amyolytic yeast ER T12.7 (Energy Convers Manage 302:118105; 10.1016/j.enconman.2024.118105)                                          |
| Enriched OFMSW + DR (17.5% dw/v total)                                     | 4            | 2               | Gupte et al. (2024) OFMSW→bioethanol CBP with amyolytic yeast ER T12.7 (Energy Convers Manage 302:118105; 10.1016/j.enconman.2024.118105)                                          |
| Mixed lignocellulosics (R. communis + S. spontaneum + S. officinarum tops) | 8            | 1               | Althuri et al. (2017) PCBP mixed lignocellulosics (Biortech 2017.08.140)                                                                                                           |
| OFMSW (organic fraction municipal solid waste; Este, Italy; 7.5% dw/v)     | 4            | 2               | Gupte et al. (2024) OFMSW→bioethanol CBP with amyolytic yeast ER T12.7 (Energy Convers Manage 302:118105; 10.1016/j.enconman.2024.118105)                                          |
| Solka Floc                                                                 | 70           | 8               | One-pot bioethanol production from cellulose by co-culture of Acremonium cellulolyticus and Saccharomyces cerevisiae                                                               |
| Switchgrass (2% w/v; untreated)                                            | 4            | 2               | Chung et al. (2015) engineered C. bescii at 75°C (Biotechnol Biofuels 8:163; 10.1186/s13068-015-0346-4)                                                                            |
| Unwashed pretreated poplar                                                 | 20           | 2               | Single-step ethanol production from lignocellulose using novel extremely thermophilic bacteria                                                                                     |
| cellobiose (1% w/v)                                                        | 4            | 2               | Chung et al. (2015) engineered C. bescii at 75°C (Biotechnol Biofuels 8:163; 10.1186/s13068-015-0346-4)                                                                            |
| $\alpha$ -cellulose                                                        | 20           | 2               | Consortia-mediated bioprocessing of cellulose to ethanol with a symbiotic Clostridium phytofermentans/yeast co-culture                                                             |
| $\alpha$ -cellulose                                                        | 7            | 1               | Direct ethanol production from cellulose by consortium of Trichoderma reesei and Candida molischiana                                                                               |
|                                                                            | 1            | 0               | Restiawaty et al. (2023) Lignocellulosic bioethanol production using Neurospora intermedia in consolidated bioprocessing (CBP) system. Biofuels. DOI:10.1080/17597269.2022.2137948 |

*Note.* Observation counts correspond to source-compilation rows. Distinct series counts are based on nonblank trajectory identifiers within each biomass–source grouping. These source-data summaries precede the series-level curation and trimming reported in the main manuscript.
